# Supplementary material
Source: HighWire-hosted journal article supplement (https://bjgpopen.org/highwire/filestream/4815/field_highwire_adjunct_files/0/BJGPO.2021.0038_Supp.pdf)
Supplement: BJGPO.2021.0038_Supp.pdf [file BJGPO.2021.0038_Supp.pdf]

## **Appendix 1 – Participant interview script**

*Q1. Since the beginning of the pandemic in Ireland (i.e. end of February 2020), have you experienced any flu-like illness or respiratory illness with a new cough, shortness of breath, fever, and/or loss of taste or smell\*?*

*Q1a. If yes, what date was this?*

*Q2. Would you rate your symptoms at the time as mild, moderate or severe?*

*{Mild- managed by self care only*

*Moderate- contacted general practice once or more*

*Severe- required review/treatment at hospital or community assessment hub }*

*Q3. Have you ever had a PCR test (a swab of your nose and throat) for COVID-19?*

*Q3a. If yes, on what date with this?*

*Q3b. If yes, what was the result?*

\* symptoms taken from local public health guidelines early in the pandemic, available at: <https://www.gov.ie/en/press-release/b4d6e-statement-from-the-national-public-health-emergency-team-tuesday-23-june/> (accessed 28/03/2021)
